# Supplementary material
Source: PubMed Central journal article supplement (PMC9107782)
Supplement: NIHMS1797946-supplement-Supplemental_Figures.pdf [file NIHMS1797946-supplement-Supplemental_Figures.pdf]

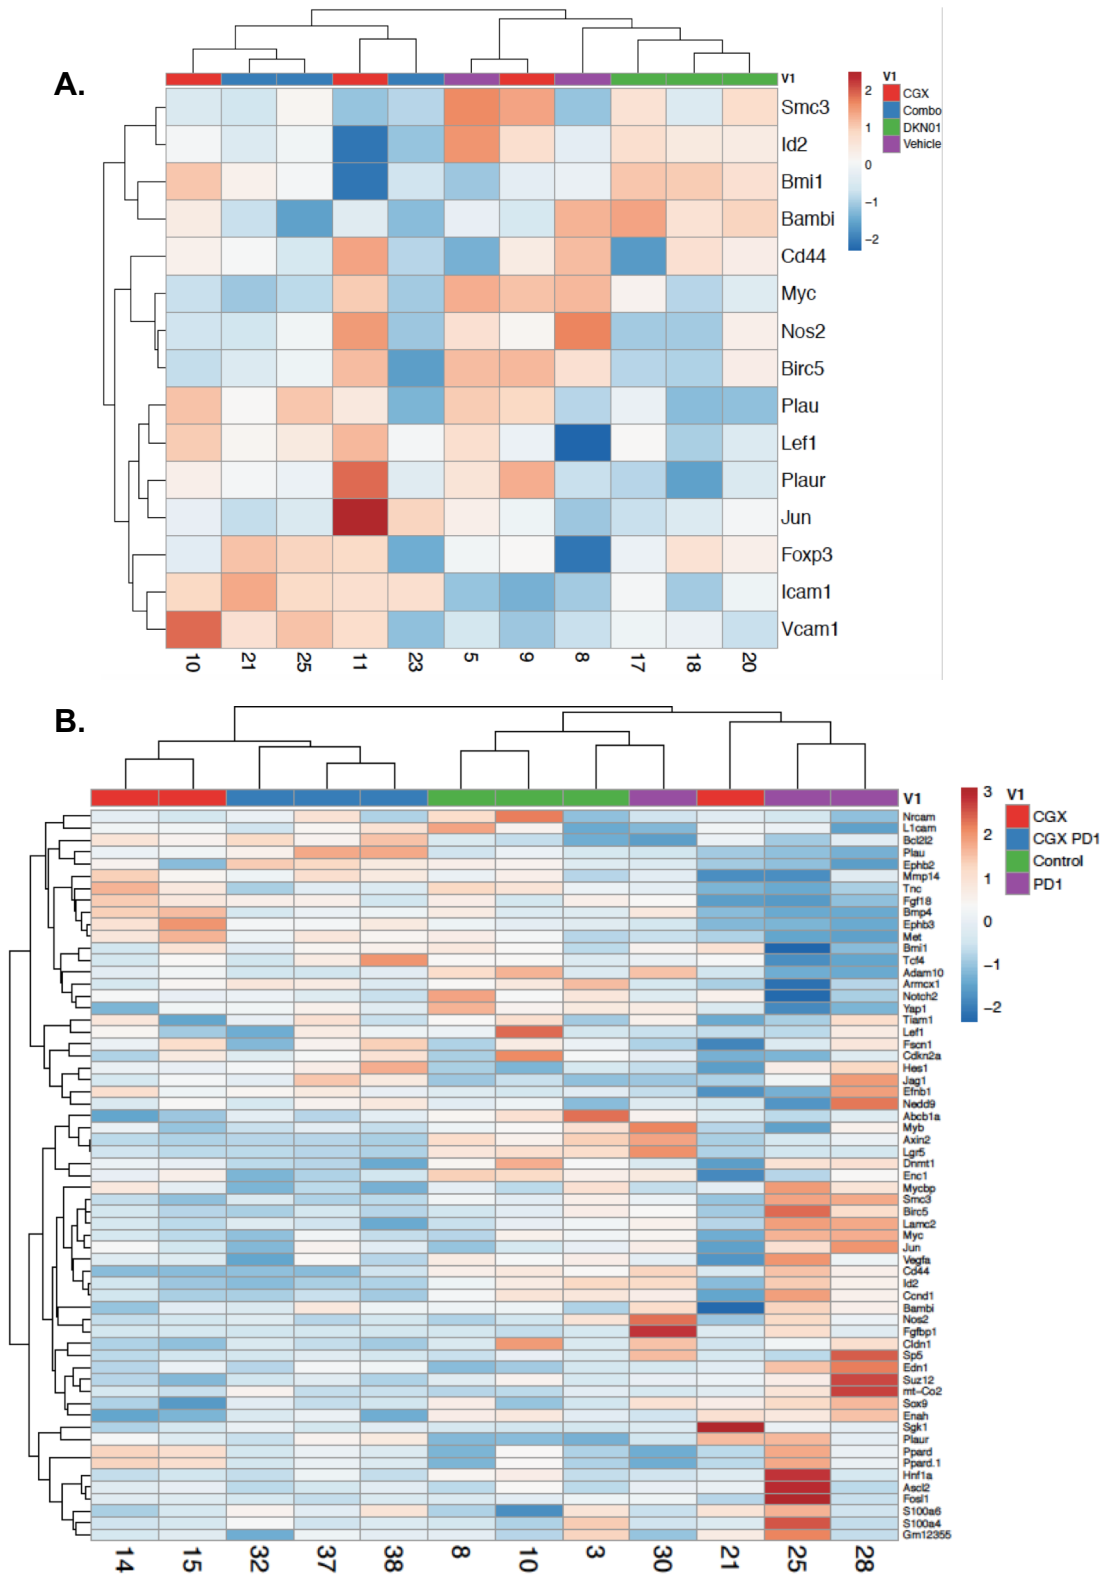

**Supplemental Figure 1. Treatment with CGX-1321 decreases *Wnt*-related gene signature.** Heat map depicting individual *Wnt*-related signaling gene expression changes in ID8p53<sup>-/-</sup> mice treated with (A) vehicle/control, DKN-01, CGX-1321, or DKN-01+CGX-1321 (Combo) or (B) vehicle/control, CGX-1321, anti-PD-1 therapy, or CGX-1321+anti-PD-1 therapy (CGX PD1).
